# Supplementary material
Source: PubMed Central journal article supplement (PMC18925)

# A.

Yin6 1: MGSELKSTSP LAVK **YDLSQKLMQR** LDRHLIFP LLEFLSLRQTHDPKELLO **RYDLLKDTN**: 60  
hInt6 1: .....MAE**YDLTRIAHF** LDRHLVFP LLEFLSVK **EIYNEKELLOKLDLLSDTN**: 49  
NES

Yin6 61: **MTDYVANLW** TNLHGHTD **EDMANAF** EKRRSVLQ **ESEEE** EVQGITL **GVLEN** PDLIAALR:120  
hInt6 50: **MVDF** AMDVYRNLYS... **DDT** PHALR **EKRRTVVAQL** KQLQAE **TEFIVKMF** EDE **PETTR** MQ:105

Yin6 120: .. **QDKGQNLQHL** QEHYNITP **ERIAVLY** KFAQ **FQYNC** GNYCGAS **DLLYH** FRAFSKDPELNA:178  
hInt6 106: **STRD** GRMLFDYL **LAKKH** GFRQ **EYLD** TLYR **YAKFQ** YECGNY **SGAAE** YLYFFRVLVPATDRNA:165

Yin6 178: **SATW** GKFASEIL **LVVD** NDGAM **ELGKLR** EMVD **SKSF** KDSAVQL **RNR** TWL **LHWSL** PPLFNH:237  
hInt6 166: **LSLW** GKLA **SEILM** QNWD **AAME** DL **TRLR** E **TDN** NSVSS **PLQSL** O **QR** TWL **LHWSL** VVFNH:225

Yin6 238: AN **CD** TL **CDL** FFVTP **VLNT** IQTS **CPW** L **RYLT** VAV **VTN** QNNAN **QKPR** N **PRO** SY **QRR** MD:296  
hInt6 226: PK **GR** DN **IDL** FLY **QOYL** NA **IQT** M **CPH** L **RYLT** TAV **ITN** ..... **KDV** R **KRR** Q ..... **V** L **KD**:276  
\*\*\*  
NLS

Yin6 297: **LVRI** IS **QEN** Y **ESD** PV **SFIS** A **LY** TEV **DPE** KA **QHC** L **R** EC **ES** V **LK** T **DF** FLV **SLC** D **H** F **LE** GA:356  
hInt6 277: **LVKVI** Q **ESY** T **KD** P **IT** E **F** V **E** C **LY** V **N** F **D** F **D** G **A** Q **K** L **R** E **C** E **S** V **L** V **N** D **F** F **L** V **A** C **L** E **D** F **I** E **N** A:336  
\*\*\*\*  
NLS

Yin6 357: **RKLL** A **EAY** C **R** I **H** S **V** I **S** V **D** V **L** A **N** K **L** E **M** D **S** A **Q** L **I** Q **L** V **E** N **R** N **N** E **S** V **A** A **A** S **N** V **A** A **D** Q **S** T **E** D **S** I:416  
hInt6 337: **RLFI** F **E** F **C** R **I** H **Q** C **I** S **I** N **M** L **A** D **K** L **N** M **T** ..... **E** ..... **E** A:367  
-----  
C-PCI domain

Yin6 417: **EST** ST **N** V **V** A **D** D **L** I **T** E **A** E **T** A **T** **E** E **E** P **E** V **Q** F **G** F **K** A **K** I **D** G **E** S **I** I **I** E **H** P **T** Y **S** A **F** **Q** Q **L** I **D** R **T** K:476  
hInt6 368: **ER** W **I** V **N** ..... **L** I **R** N **A** R **L** D **A** K ..... **I** . **D** S **K** L **G** . **H** V **V** M **G** N **N** A **V** S **P** Y **Q** Q **V** I **E** K **T** K:409  
-----

Yin6 477: **SL** S **F** E **S** Q ..... **N** L **E** Q **S** T **A** K **S** I **S** E **L** K **H** A **T** V ..... :501  
hInt6 410: **SL** S **F** R **S** Q **M** L **A** M **N** I **E** K **K** L **N** Q **N** S **R** S **E** A **P** N **W** A **T** Q **D** S **G** F **Y**:445

# B.

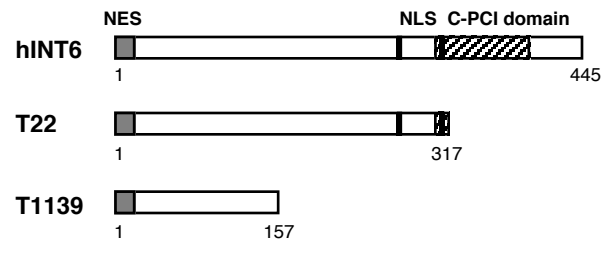

Supplement: pnas_97_26_14370__2.pdf [file pnas_97_26_14370__2.pdf]
